# Supplementary material
Source: PubMed Central journal article supplement (PMC6739222)
Supplement: EMS84224-supplement-Appendices.pdf [file EMS84224-supplement-Appendices.pdf]

## Appendix A: Tables and figures

Appendix B: Distribution of model parameters  
from MCMC simulations

Table A.1. Gaussian fits to the IRAM 30m lines.

|                     |                                  | PDR             |                                    |             |                                             | Core            |                                    |             |                                             |
|---------------------|----------------------------------|-----------------|------------------------------------|-------------|---------------------------------------------|-----------------|------------------------------------|-------------|---------------------------------------------|
|                     |                                  | $T_{MB}$<br>(K) | $v_{LSR}$<br>(km s <sup>-1</sup> ) | $\Delta v$  | $\int T_{MB} dv$<br>(K km s <sup>-1</sup> ) | $T_{MB}$<br>(K) | $v_{LSR}$<br>(km s <sup>-1</sup> ) | $\Delta v$  | $\int T_{MB} dv$<br>(K km s <sup>-1</sup> ) |
| CS                  | 2→1                              | 3.00            | 10.70±0.01                         | 0.76±0.01   | 2.440±0.003                                 | 5.60            | 10.67±0.01                         | 0.79±0.01   | 4.752±0.004                                 |
|                     | 3→2                              | 2.20            | 10.67±0.01                         | 0.74±0.01   | 1.705±0.009                                 | 4.70            | 10.63±0.01                         | 0.74±0.01   | 3.662±0.007                                 |
|                     | 5→4                              | 0.94            | 10.65±0.01                         | 0.59±0.01   | 0.592±0.007                                 | 1.20            | 10.61±0.01                         | 0.63±0.01   | 0.805±0.007                                 |
| C <sup>34</sup> S   | 2→1                              | 0.41            | 10.72±0.01                         | 0.55±0.01   | 0.241±0.003                                 | 0.78            | 10.70±0.01                         | 0.61±0.01   | 0.505±0.002                                 |
|                     | 3→2                              | 0.34            | 10.72±0.01                         | 0.54±0.03   | 0.195±0.008                                 | 0.49            | 10.67±0.01                         | 0.56±0.01   | 0.291±0.007                                 |
|                     | 5→4                              | 0.05            | 10.57±0.06                         | 0.46±0.12   | 0.027±0.006                                 | -               | -                                  | -           | -                                           |
| <sup>13</sup> CS    | 2→1                              | 0.11            | 10.71±0.01                         | 0.52±0.03   | 0.063±0.003                                 | 0.20            | 10.70±0.01                         | 0.58±0.02   | 0.127±0.003                                 |
|                     | 3→2                              | 0.05            | 10.61±0.07                         | 0.66±0.16   | 0.037±0.008                                 | 0.16            | 10.62±0.01                         | 0.51±0.04   | 0.088±0.006                                 |
| C <sup>33</sup> S   | 2→1                              | 0.07            | 11.50±0.02                         | 0.48±0.05   | 0.034±0.003                                 | 0.09            | 11.46±0.02                         | 0.74±0.05   | 0.074±0.004                                 |
|                     | 3→2                              | -               | -                                  | -           | -                                           | 0.08            | 10.92±0.05                         | 0.56±0.09   | 0.046±0.007                                 |
| CCS                 | 6 <sub>7</sub> →5 <sub>6</sub>   | 0.09            | 10.76±0.04                         | 0.42±0.09   | 0.042±0.008                                 | 0.31            | 10.70±0.01                         | 0.44±0.03   | 0.146±0.007                                 |
|                     | 7 <sub>6</sub> →6 <sub>5</sub>   | 0.04            | 10.76±0.03                         | 0.35±0.06   | 0.014±0.002                                 | 0.09            | 10.70±0.01                         | 0.37±0.04   | 0.037±0.003                                 |
|                     | 7 <sub>7</sub> →6 <sub>6</sub>   | 0.04            | 10.73±0.03                         | 0.40±0.07   | 0.017±0.003                                 | 0.08            | 10.68±0.01                         | 0.47±0.03   | 0.042±0.002                                 |
|                     | 7 <sub>8</sub> →6 <sub>7</sub>   | 0.07            | 10.71±0.02                         | 0.48±0.03   | 0.036±0.002                                 | 0.23            | 10.69±0.01                         | 0.47±0.01   | 0.117±0.002                                 |
|                     | 8 <sub>7</sub> →7 <sub>6</sub>   | -               | -                                  | -           | -                                           | 0.08            | 10.76±0.02                         | 0.33±0.05   | 0.030±0.003                                 |
|                     | 8 <sub>8</sub> →7 <sub>7</sub>   | 0.04            | 10.74±0.03                         | 0.32±0.08   | 0.013±0.002                                 | 0.07            | 10.68±0.02                         | 0.39±0.05   | 0.031±0.003                                 |
| OCS                 | 7→6                              | 0.02            | 10.72±0.06                         | 0.57±0.11   | 0.014±0.003                                 | 0.06            | 10.69±0.04                         | 0.75±0.09   | 0.045±0.005                                 |
|                     | 8→7                              | 0.04            | 10.76±0.02                         | 0.40±0.04   | 0.019±0.002                                 | 0.05            | 10.62±0.02                         | 0.61±0.05   | 0.033±0.002                                 |
|                     | 9→8                              | 0.05            | 10.66±0.05                         | 0.48±0.14   | 0.024±0.005                                 | 0.07            | 10.76±0.03                         | 0.45±0.01   | 0.034±0.004                                 |
|                     | 11→10                            | -               | -                                  | -           | -                                           | 0.05            | 10.60±0.04                         | 0.41±0.09   | 0.023±0.004                                 |
|                     | 12→11                            | -               | -                                  | -           | -                                           | 0.08            | 10.50±0.05                         | 0.59±0.14   | 0.048±0.009                                 |
| p-H <sub>2</sub> CS | 3 <sub>03</sub> →2 <sub>02</sub> | 0.08            | 10.72±0.02                         | 0.52±0.04   | 0.046±0.003                                 | 0.23            | 10.65±0.01                         | 0.55±0.02   | 0.137±0.003                                 |
|                     | 4 <sub>04</sub> →3 <sub>03</sub> | 0.05            | 10.78±0.03                         | 0.30±0.08   | 0.017±0.004                                 | 0.23            | 10.68±0.02                         | 0.46±0.03   | 0.113±0.005                                 |
|                     | 6 <sub>06</sub> →5 <sub>05</sub> | -               | -                                  | -           | -                                           | 0.04            | 10.76±0.05                         | 0.70±0.11   | 0.032±0.005                                 |
| o-H <sub>2</sub> CS | 3 <sub>13</sub> →2 <sub>12</sub> | 0.13            | 10.68±0.01                         | 0.47±0.03   | 0.066±0.003                                 | 0.33            | 10.65±0.01                         | 0.51±0.01   | 0.179±0.003                                 |
|                     | 3 <sub>12</sub> →2 <sub>11</sub> | 0.14            | 10.75±0.05                         | 0.47±0.03   | 0.071±0.003                                 | 0.30            | 10.71±0.01                         | 0.55±0.01   | 0.177±0.003                                 |
|                     | 4 <sub>14</sub> →3 <sub>13</sub> | 0.16            | 10.65±0.02                         | 0.49±0.04   | 0.084±0.005                                 | 0.31            | 10.61±0.01                         | 0.52±0.02   | 0.173±0.005                                 |
|                     | 4 <sub>13</sub> →3 <sub>12</sub> | 0.10            | 10.84±0.02                         | 0.44±0.05   | 0.046±0.005                                 | 0.28            | 10.80±0.02                         | 0.43±0.02   | 0.131±0.005                                 |
| HDCS                | 3 <sub>03</sub> →2 <sub>02</sub> | -               | -                                  | -           | -                                           | 0.06            | 10.63±0.02                         | 0.34±0.04   | 0.022±0.002                                 |
|                     | 3 <sub>13</sub> →2 <sub>12</sub> | -               | -                                  | -           | -                                           | -               | -                                  | -           | -                                           |
|                     | 3 <sub>12</sub> →2 <sub>11</sub> | 0.05            | 10.79±0.02                         | 0.31±0.05   | 0.018±0.002                                 | 0.05            | 10.79±0.02                         | 0.50±0.08   | 0.027±0.003                                 |
| HCS <sup>+</sup>    | 2→1                              | 0.13            | 10.75±0.02                         | 0.73±0.03   | 0.102±0.004                                 | 0.11            | 10.75±0.01                         | 0.66±0.03   | 0.073±0.003                                 |
|                     | 5→4                              | 0.11            | 10.75±0.03                         | 0.62±0.07   | 0.069±0.007                                 | -               | -                                  | -           | -                                           |
|                     | 6→5                              | 0.06            | 10.64±0.05                         | 0.65±0.14   | 0.039±0.006                                 | -               | -                                  | -           | -                                           |
| SO                  | 2 <sub>2</sub> →1 <sub>1</sub>   | 0.45            | 10.72±0.01                         | 0.50±0.01   | 0.241±0.005                                 | 0.50            | 10.66±0.01                         | 0.55±0.08   | 0.293±0.003                                 |
|                     | 2 <sub>3</sub> →1 <sub>2</sub>   | 3.20            | 10.73±0.01                         | 0.58±0.01   | 2.004±0.003                                 | 4.50            | 10.66±0.01                         | 0.65±0.01   | 3.151±0.003                                 |
|                     | 3 <sub>2</sub> →2 <sub>1</sub>   | 0.55            | 10.73±0.01                         | 0.48±0.01   | 0.285±0.004                                 | 0.73            | 10.64±0.01                         | 0.50±0.01   | 0.392±0.005                                 |
|                     | 3 <sub>3</sub> →2 <sub>2</sub>   | 0.70            | 10.72±0.01                         | 0.43±0.01   | 0.317±0.005                                 | 1.10            | 10.61±0.01                         | 0.45±0.01   | 0.521±0.005                                 |
|                     | 3 <sub>4</sub> →2 <sub>3</sub>   | 2.40            | 10.68±0.01                         | 0.56±0.01   | 1.466±0.005                                 | 4.40            | 10.61±0.01                         | 0.58±0.01   | 2.731±0.007                                 |
|                     | 4 <sub>3</sub> →3 <sub>2</sub>   | 0.55            | 10.69±0.01                         | 0.52±0.02   | 0.305±0.011                                 | 0.92            | 10.60±0.01                         | 0.45±0.02   | 0.442±0.013                                 |
|                     | 5 <sub>4</sub> →4 <sub>3</sub>   | 0.34            | 10.69±0.01                         | 0.63±0.01   | 0.225±0.003                                 | 0.40            | 10.61±0.01                         | 0.59±0.02   | 0.254±0.007                                 |
|                     | 5 <sub>5</sub> →4 <sub>4</sub>   | 0.34            | 10.70±0.01                         | 0.45±0.01   | 0.166±0.007                                 | 0.40            | 10.59±0.01                         | 0.48±0.02   | 0.204±0.007                                 |
|                     | 5 <sub>6</sub> →4 <sub>5</sub>   | 1.23            | 10.68±0.01                         | 0.62±0.01   | 0.812±0.007                                 | 1.48            | 10.62±0.01                         | 0.60±0.01   | 0.944±0.006                                 |
|                     | -                                | -               | -                                  | -           | -                                           | 0.02            | 10.82±0.06                         | 0.99±0.12   | 0.022±0.002                                 |
| <sup>34</sup> SO    | 2 <sub>2</sub> →1 <sub>1</sub>   | 0.22            | 10.74±0.01                         | 0.54±0.02   | 0.130±0.003                                 | 0.30            | 10.65±0.01                         | 0.54±0.02   | 0.172±0.003                                 |
|                     | 2 <sub>3</sub> →1 <sub>2</sub>   | -               | -                                  | -           | -                                           | 0.06            | 10.56±0.03                         | 0.38±0.07   | 0.024±0.004                                 |
|                     | 3 <sub>2</sub> →2 <sub>1</sub>   | -               | -                                  | -           | -                                           | 0.31            | 10.59±0.03                         | 0.49±0.02   | 0.164±0.006                                 |
|                     | 3 <sub>4</sub> →2 <sub>3</sub>   | 0.22            | 10.71±0.01                         | 0.46±0.03   | 0.106±0.005                                 | 0.07            | 10.50±0.06                         | 0.97±0.14   | 0.069±0.008                                 |
|                     | 5 <sub>6</sub> →4 <sub>5</sub>   | 0.10            | 10.64±0.03                         | 0.40±0.11   | 0.043±0.007                                 | 0.04            | 10.67±0.04                         | 0.66±0.09   | 0.028±0.003                                 |
| S <sup>18</sup> O   | 2 <sub>3</sub> →1 <sub>2</sub>   | -               | -                                  | -           | -                                           | 0.04            | 10.67±0.04                         | 0.67±0.09   | 0.028±0.003                                 |
|                     | 9/2→7/2 (e)                      | 0.10            | 10.70±0.04                         | 0.77±0.10   | 0.082±0.009                                 | 0.07            | 10.66±0.05                         | 0.70±0.10   | 0.050±0.006                                 |
|                     | 9/2→7/2 (f)                      | 0.09            | 10.73±0.03                         | 0.67±0.07   | 0.068±0.006                                 | 0.05            | 10.77±0.11                         | 0.96±0.30   | 0.047±0.011                                 |
|                     | 11/2→9/2 (e)                     | 0.07            | 10.69±0.04                         | 0.50±0.08   | 0.037±0.006                                 | 0.05            | 10.78±0.07                         | 0.48±0.16   | 0.023±0.006                                 |
| 11/2→9/2 (f)        | 0.05                             | 10.72±0.05      | 0.67±0.12                          | 0.037±0.005 | -                                           | -               | -                                  | -           |                                             |
| SO <sup>+</sup>     | 3 <sub>13</sub> →2 <sub>02</sub> | 0.29            | 10.74±0.01                         | 0.47±0.02   | 0.143±0.003                                 | 0.25            | 10.65±0.01                         | 0.58±0.01   | 0.156±0.002                                 |
|                     | 5 <sub>15</sub> →4 <sub>04</sub> | 0.27            | 10.72±0.01                         | 0.47±0.03   | 0.132±0.005                                 | 0.28            | 10.62±0.01                         | 0.48±0.02   | 0.148±0.004                                 |
|                     | 3 <sub>22</sub> →2 <sub>11</sub> | 0.09            | 10.70±0.06                         | 0.36±0.30   | 0.033±0.007                                 | 0.09            | 10.73±0.04                         | 0.68±0.08   | 0.068±0.007                                 |
|                     | 4 <sub>22</sub> →3 <sub>13</sub> | 0.09            | 10.70±0.03                         | 0.58±0.06   | 0.054±0.005                                 | 0.06            | 10.50±0.05                         | 0.815±0.153 | 0.049±0.007                                 |
|                     | 5 <sub>24</sub> →4 <sub>13</sub> | -               | -                                  | -           | -                                           | 0.08            | 10.69±0.05                         | 0.46±0.11   | 0.039±0.008                                 |
| NS                  | 5/2,7/2→3/2,5/2 (e)              | 0.18            | 10.77±0.04                         | 0.61±0.08   | 0.12±0.01                                   | 0.20            | 10.91±0.03                         | 0.54±0.05   | 0.110±0.010                                 |
|                     | 5/2,5/2→3/2,3/2 (e)              | 0.14            | 10.90±0.04                         | 0.51±0.10   | 0.075±0.012                                 | 0.11            | 10.83±0.06                         | 0.53±0.21   | 0.059±0.015                                 |
|                     | 5/2,3/2→3/2,1/2 (e)              | 0.12            | 11.07±0.04                         | 0.59±0.09   | 0.074±0.010                                 | 0.10            | 10.84±0.06                         | 0.58±0.22   | 0.063±0.015                                 |
|                     | 5/2,7/2→3/2,5/2 (f)              | 0.24            | 10.50±0.02                         | 0.37±0.05   | 0.094±0.012                                 | 0.20            | 10.34±0.04                         | 0.59±0.11   | 0.127±0.018                                 |
|                     | 5/2,5/2→3/2,3/2 (f)              | 0.14            | 10.58±0.07                         | 0.56±0.22   | 0.084±0.024                                 | 0.16            | 10.38±0.04                         | 0.27±0.12   | 0.045±0.014                                 |
|                     | 5/2,3/2→3/2,1/2 (f)              | 0.21            | 10.52±0.03                         | 0.31±0.06   | 0.069±0.012                                 | 0.14            | 10.39±0.06                         | 0.45±0.16   | 0.017±0.019                                 |
| NS <sup>+</sup>     | 2→1                              | 0.034           | 10.46±0.04                         | 0.77±0.08   | 0.028±0.002                                 | 0.017           | 10.44±0.09                         | 1.0±0.3     | 0.019±0.004                                 |
|                     | 3→2                              | 0.035           | 10.64±0.10                         | 0.76±0.26   | 0.028±0.007                                 | -               | -                                  | -           | -                                           |

**Notes.** Tabulated errors are the numerical errors of the Gaussian fitting. Other kinds of errors such as calibration or pointing errors are not considered.

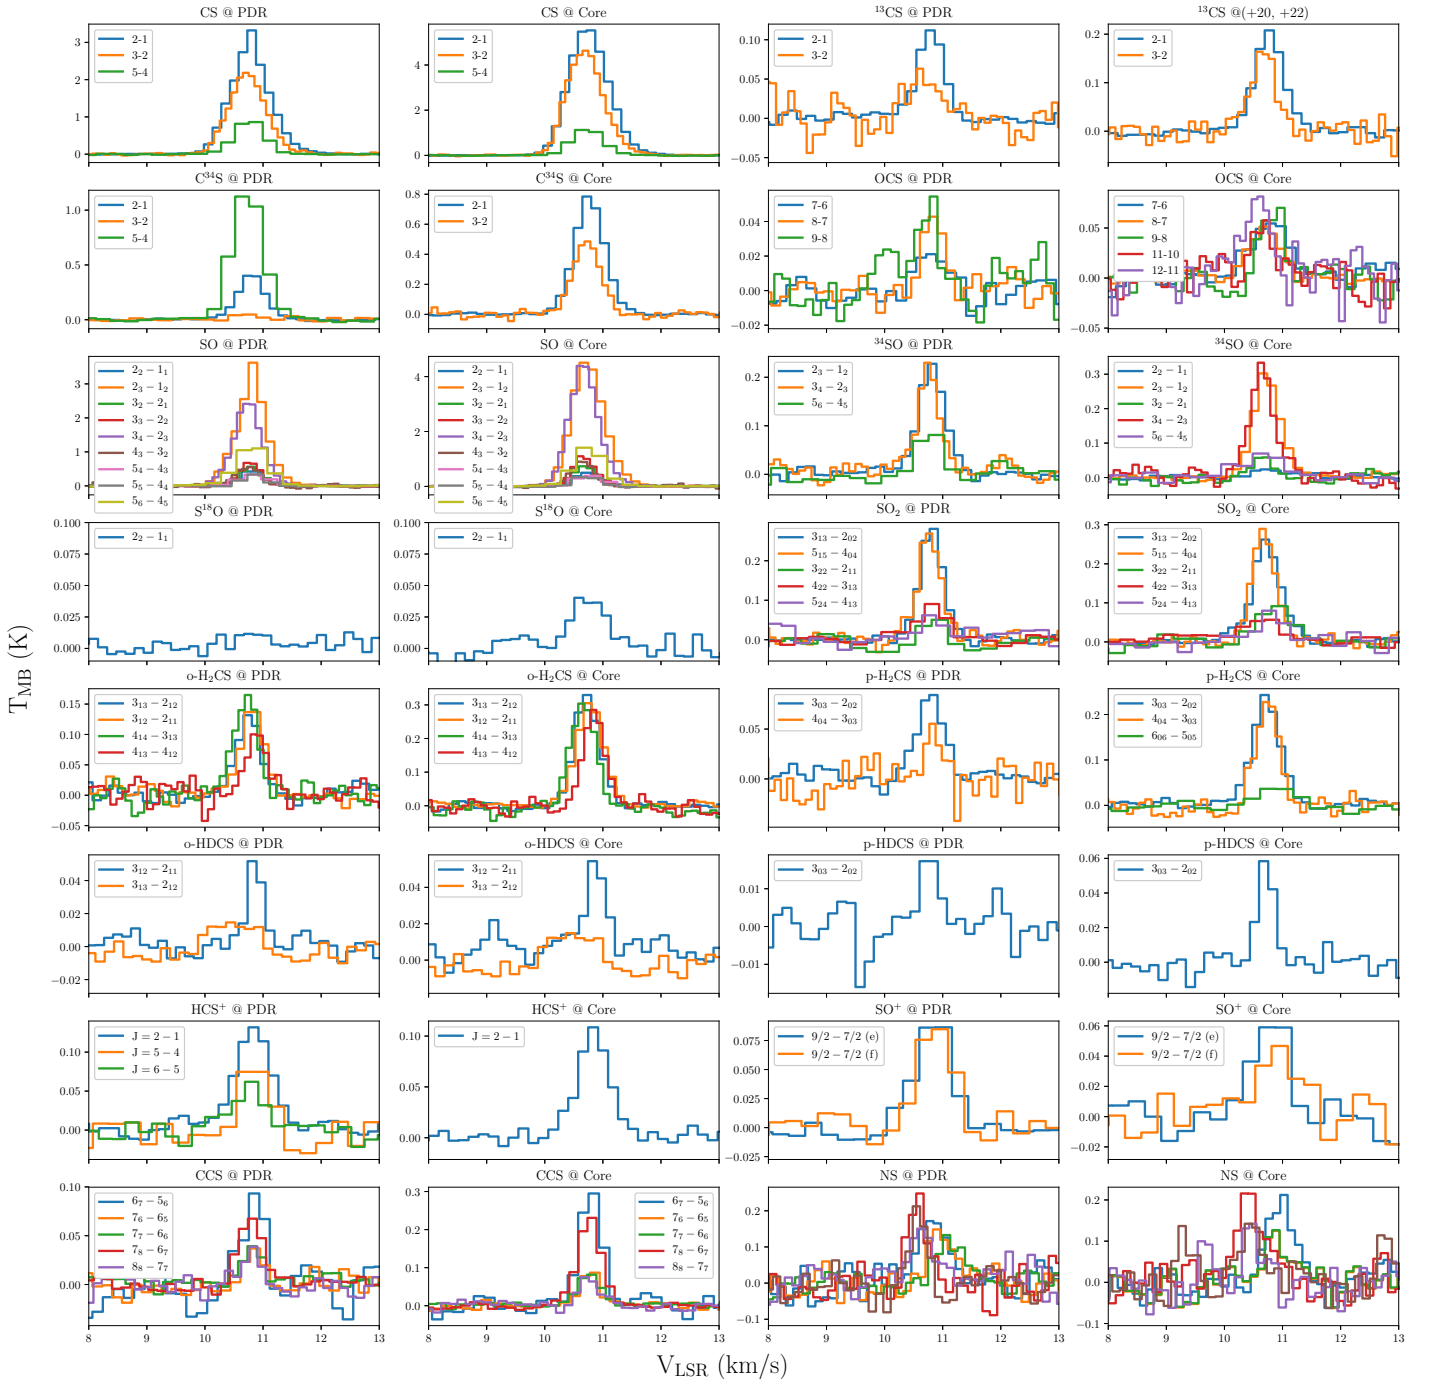

Fig. A.1. Detected species in the Horsehead.

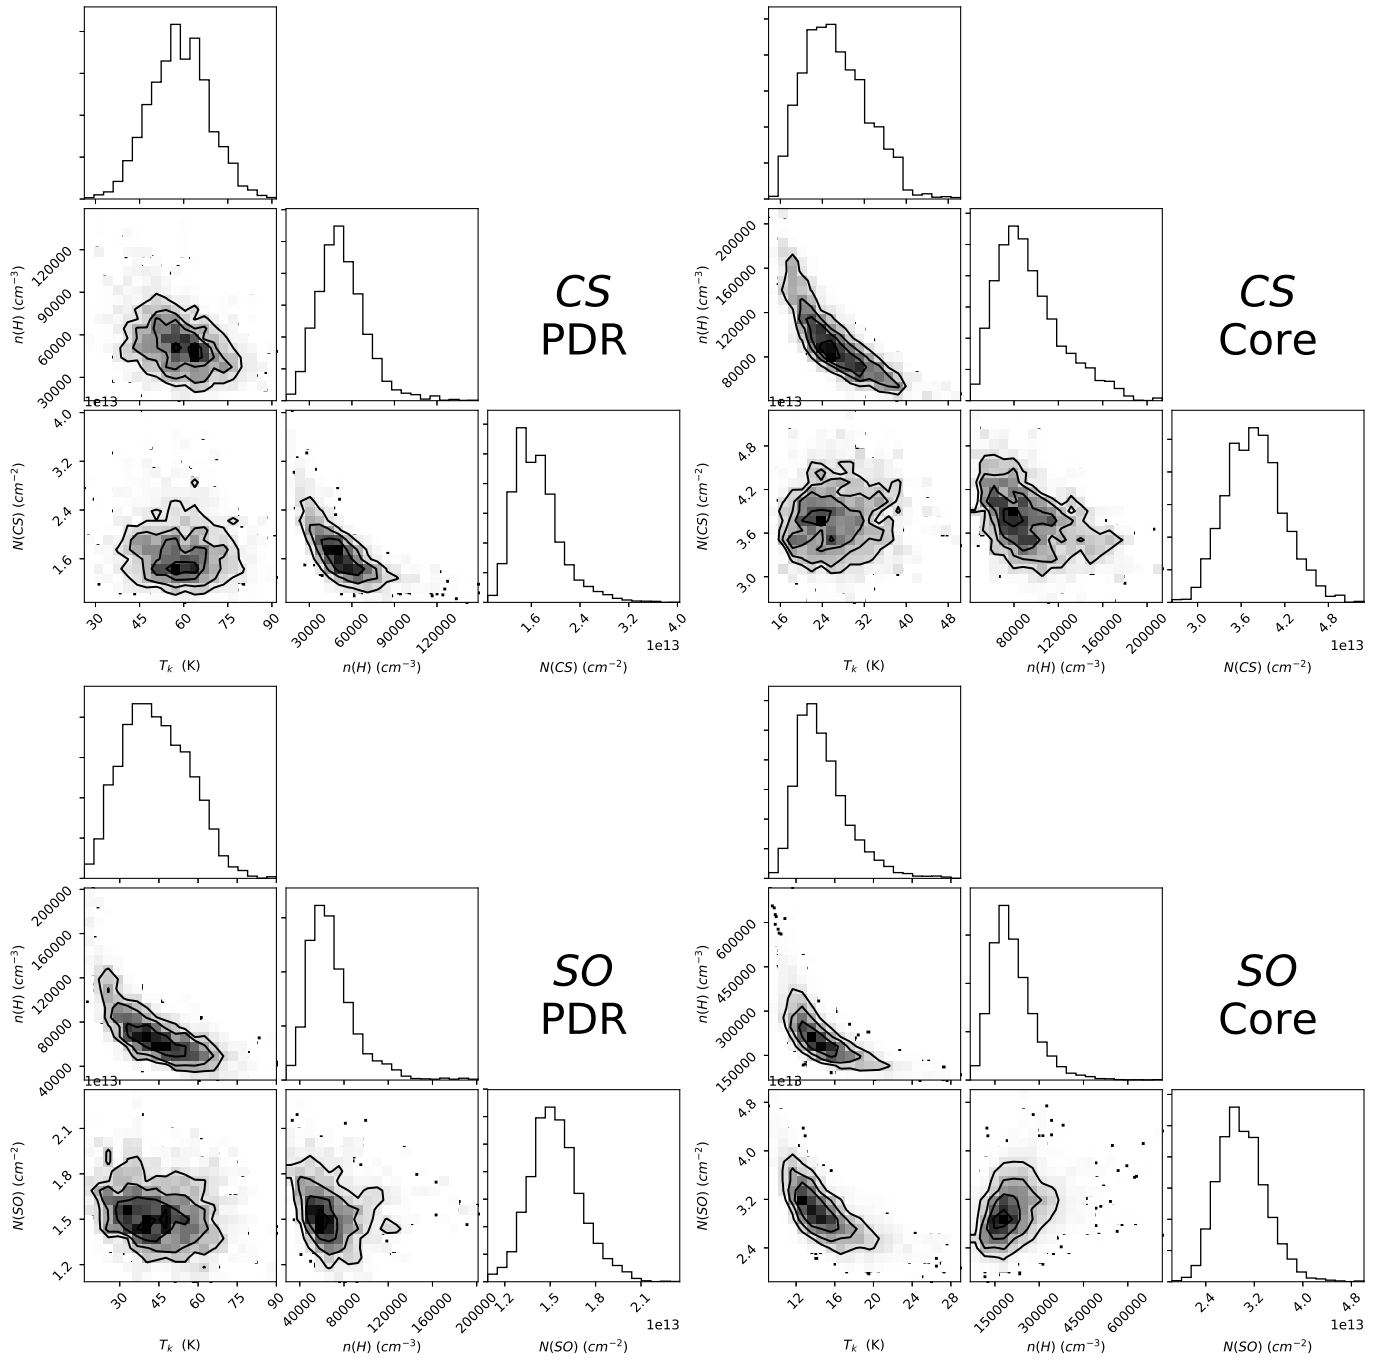

**Fig. B.1.** Histograms of the MCMC RADEX parameter distribution for the different molecules and regions studied.

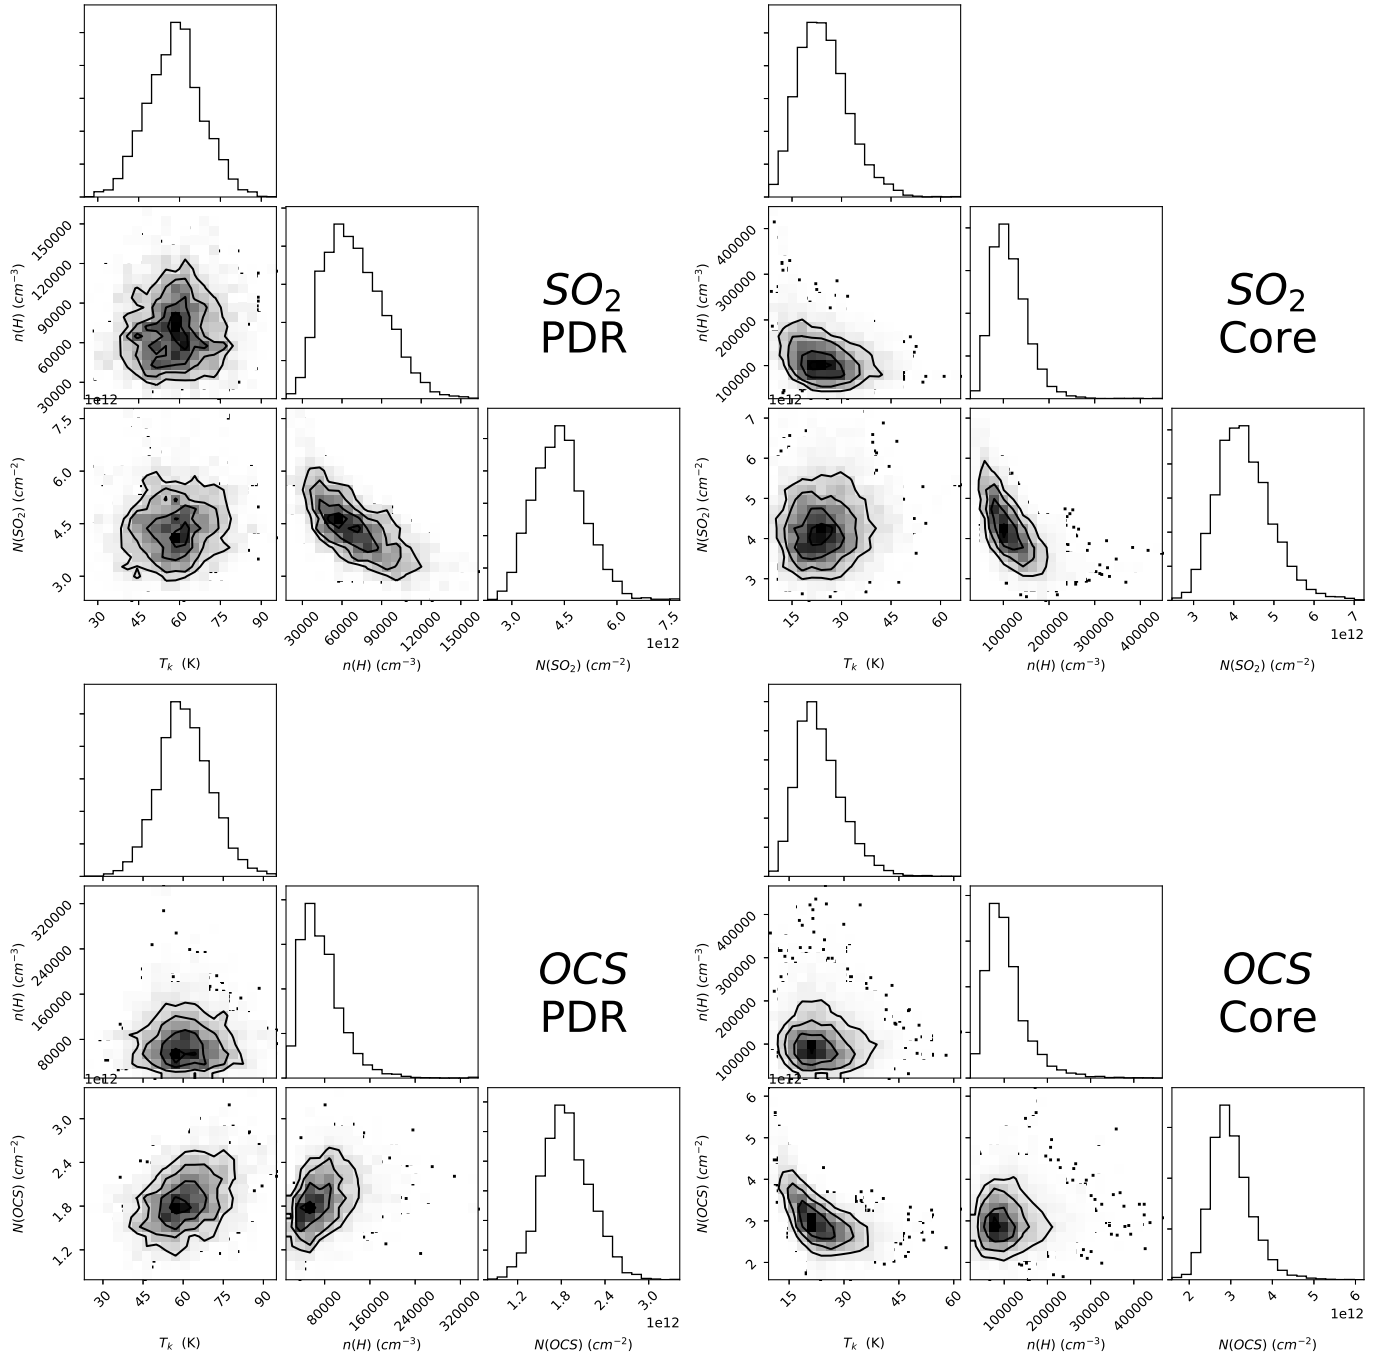

**Fig. B.1.** Histograms of the MCMC RADEX parameter distribution for the different molecules and regions studied.

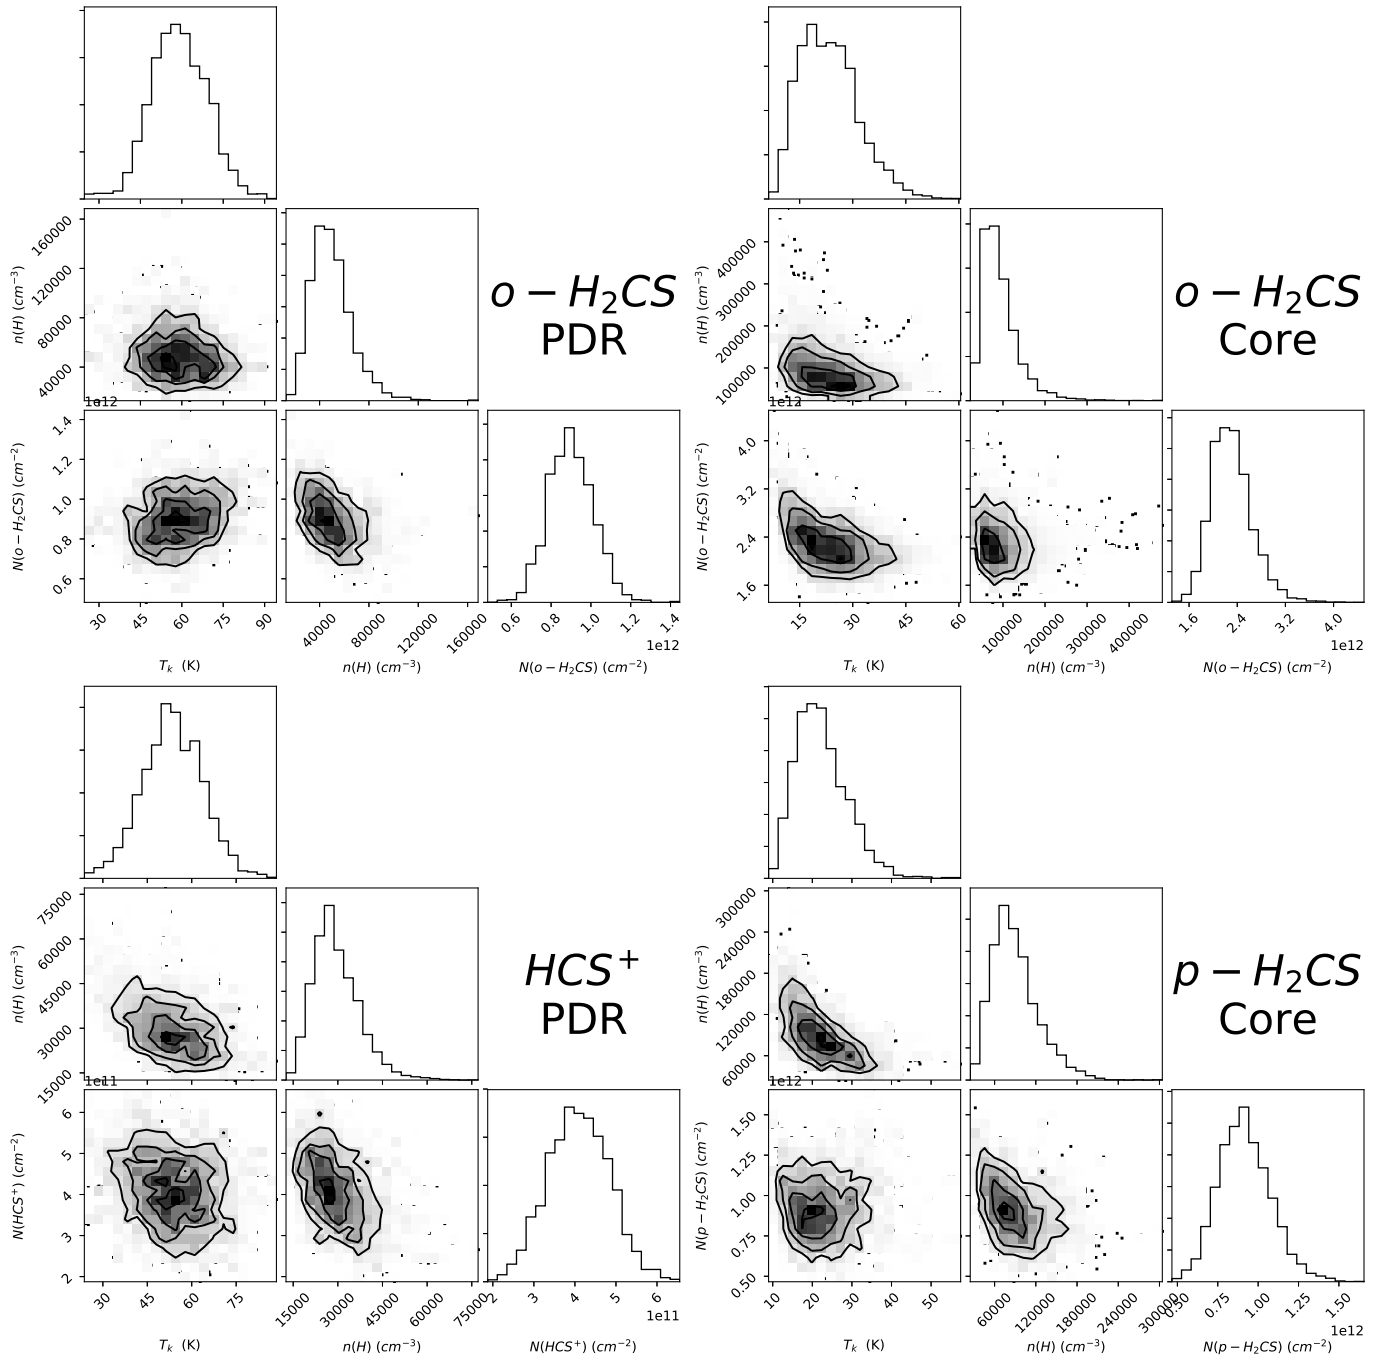

**Fig. B.1.** Histograms of the MCMC RADEX parameter distribution for the different molecules and regions studied.
